# Supplementary material for: Molecular cocrystals of diphenyloxazole with tunable fluorescence, up-conversion emission and dielectric properties
Source: Royal Society of Chemistry journal article supplement (doi:10.1039/c5ce02019k), 2015-11-23
Supplement: c5ce02019k1.pdf [file c5ce02019k1.pdf]

## Supporting Information for

### Molecular Co-crystals of 2,5-diphenyloxazole with Tunable Fluorescence, Up-conversion Emission and Dielectric Properties

Guoling Fan,<sup>b</sup> Xiaogang Yang,<sup>a</sup> Ruizheng Liang,<sup>b</sup> Jingwen Zhao,<sup>b</sup> Shuzhen Li,<sup>b</sup> and  
Dongpeng Yan<sup>\*,a,b</sup>

a: Key Laboratory of Theoretical and Computational Photochemistry, Ministry of Education, College of Chemistry, Beijing Normal University, Beijing 100875, China

b: State Key Laboratory of Chemical Resource Engineering, Beijing University of Chemical Technology, Beijing 100029, P. R. China

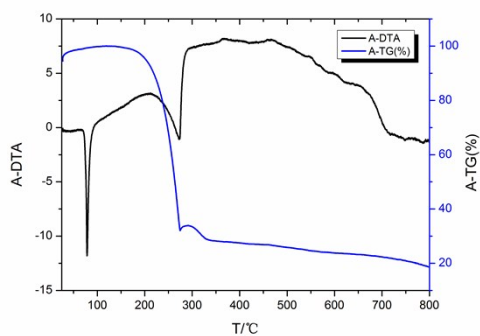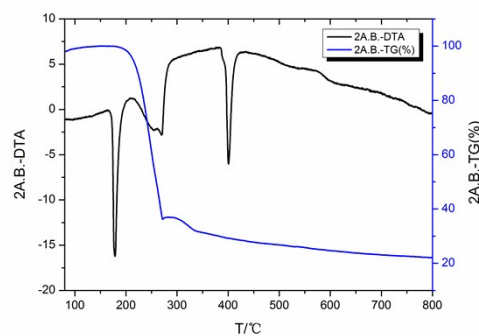

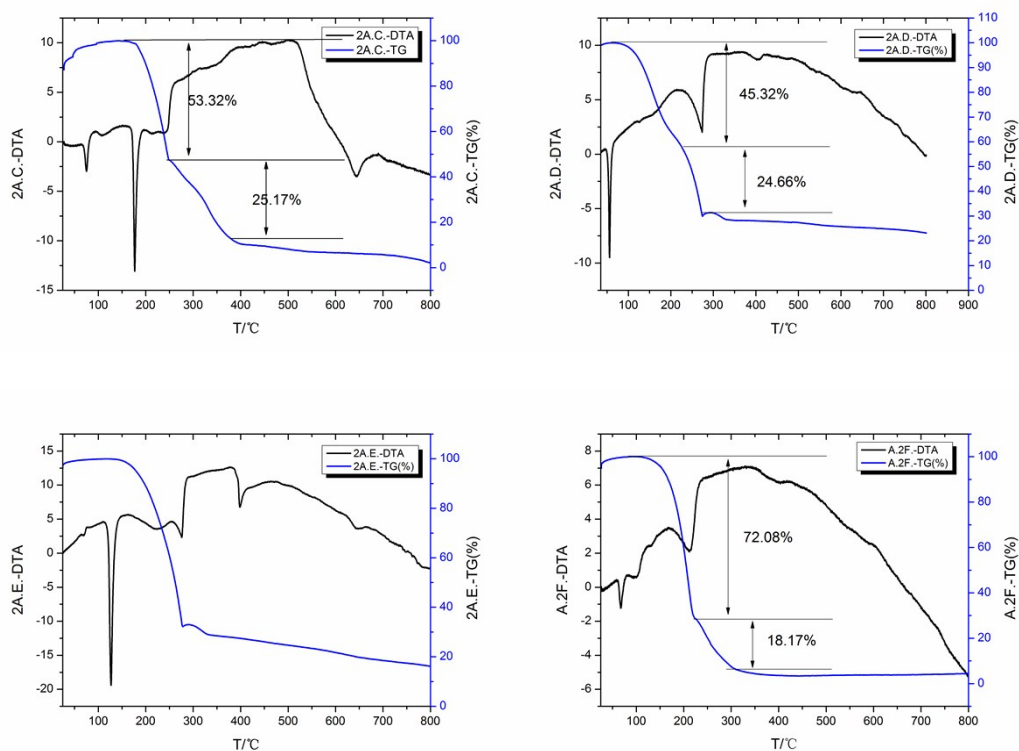

**Figure S1.** TG-DTA curves of pristine **A** and its cocrystals (**2A.B.**, **2A.C.**, **2A.D.**, **2A.E.**, **A.2F.**).

The TGA curve of **A** and its cocrystals show that first obvious weight loss occur at 191°C, 195, 180, 114, 164 and 156 °C for **A**, **2A.B.**, **2A.C.**, **2A.D.**, **2A.E.** and **A.2F.**, respectively. Moreover, the TG curves of **2A.C.**, **2A.D.**, and **A.2F.** indicate that the weight loss underwent a two step process for the three systems.

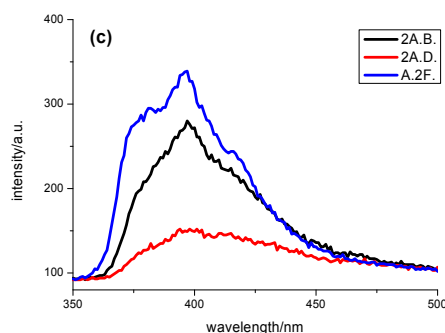

**Figure S2.** The cocrystals of **2A.B.**, **2A.D.** and **A.2F.** excited by an 800 nm laser (21 mW).
